# Supplementary material for: Exosomal microRNAs miR-30d-5p and miR-126a-5p Are Associated with Heart Failure with Preserved Ejection Fraction in STZ-Induced Type 1 Diabetic Rats
Source: MDPI journal article supplement (doi:10.3390/ijms23147514), 2022-07-06
Supplement: s1 [file s1]

**Table S1. Primer sets for RT-qPCR**

| Gene         | Accession number | Forward              | Reverse              | Amplicon length (bp) |
|--------------|------------------|----------------------|----------------------|----------------------|
| <i>Myh6</i>  | NM_012612.2      | GGAAGTCAACCCGTCTCAGA | TGGGCTCCAATCCTGTCAAT | 168                  |
| <i>Myh7</i>  | NM_031545.1      | AGTCCTAGCCAGTCTCCAGA | GTCTCTCCTGGATCCGGAAG | 172                  |
| <i>Nppa</i>  | NM_017239.2      | AAGCCCACTTCTCTCTGGTC | CCTTTGCCTTTCCCACTGTC | 190                  |
| <i>Nppb</i>  | NM_017240.2      | CCAGTCCCGAGGTGTACTTT | TCCTCCTTCATGTTGGCCAT | 195                  |
| <i>Rn18s</i> | NR_046237        | GCAATTATTCCCCATGAACG | GGCCTCACTAAACCATCCAA | 123                  |

**Table S2. Primer sets for stem-loop RT-qPCR**

| Assay       | Accession number | Reverse transcription stem loop primer               | PCR forward primer        | Universal PCR reverse primer |
|-------------|------------------|------------------------------------------------------|---------------------------|------------------------------|
| miR-1-3p    | MIMAT0003125     | CTCAACTGGTGTCTGGAGTCGGCAATTCAGTTGAG<br>ATACACACTT    | CGGTGGAATGTAAAGAAGTGTGTAT | CTCAACTGGTGTCTGGAGT          |
| miR-21-5p   | MIMAT0000790     | CTCAACTGGTGTCTGGAGTCGGCAATTCAGTTGAG<br>TCAACATCAG    | CGGTAGCTTATCAGACTGATGTTGA |                              |
| miR-29a-5p  | MIMAT0004718     | CTCAACTGGTGTCTGGAGTCGGCAATTCAGTTGAG<br>CTGAACACCA    | CGGACTGATTTCTTTTGGTGTTCAG |                              |
| miR-30d-5p  | MIMAT0000807     | CTCAACTGGTGTCTGGAGTCGGCAATTCAGTTGAG<br>CTTCCAGTCG    | TGTAAACATCCCCGACTGGAAG    |                              |
| miR-34a-5p  | MIMAT0000815     | CTCAACTGGTGTCTGGAGTCGGCAATTCAGTTGAG<br>ACAACCAGCT    | TGGCAGTGTCTTAGCTGGTTGT    |                              |
| miR-126a-5p | MIMAT0000831     | CTCAACTGGTGTCTGGAGTCGGCAATTCAGTTGAG<br>CGCGTACCAA    | CGGCATTATTACTTTTGGTACGCG  |                              |
| miR-143-3p  | MIMAT0000849     | CTCAACTGGTGTCTGGAGTCGGCAATTCAGTTGAG<br>TGAGCTACAG    | TGAGATGAAGCACTGTAGCTCA    |                              |
| miR-145-5p  | MIMAT0000851     | CTCAACTGGTGTCTGGAGTCGGCAATTCAGTTGAG<br>AGGGATTCCCT   | GTCCAGTTTTCCAGGAATCCCT    |                              |
| miR-195-5p  | MIMAT0000870     | CTCAACTGGTGTCTGGAGTCGGCAATTCAGTTGAG<br>GCCAATATTT    | CGGTAGCAGCACAGAAATATTGGC  |                              |
| miR-206-3p  | MIMAT0000879     | CTCAACTGGTGTCTGGAGTCGGCAATTCAGTTGAG<br>CCACACACTT    | TGGAATGTAAGGAAGTGTGTGG    |                              |
| miR-320-3p  | MIMAT0000903     | CTCAACTGGTGTCTGGAGTCGGCAATTCAGTTGAG<br>TCGCCCTCTC    | AAAAGCTGGGTTGAGAGGGCGA    |                              |
| miR-378a-3p | MIMAT0003379     | CTCAACTGGTGTCTGGAGTCGGCAATTCAGTTGAG<br>CCTTCTGACT    | ACTGGACTTGGAGTCAGAAGG     |                              |
| RNU6        | NR_004394.1      | CTCAACTGGTGTCTGGAGTCGGCAATTCAGTTGAG<br>AAAATATGGAACG | CAAATTCGTGAAGCGTTCCA      |                              |

Figure S1

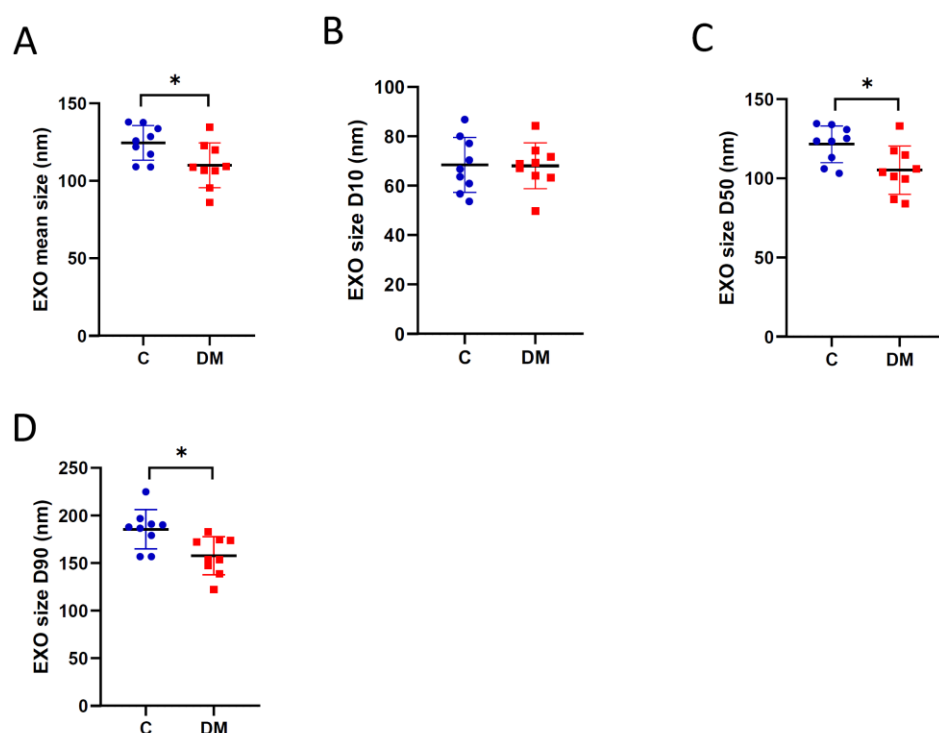

**Figure S1. Size distribution of EXOs in control and DM plasma.** The size-concentration distribution of EXOs was analyzed by nanoparticle tracking analysis (NTA). (A) Mean size, (B) size D10, (C) size D50, (D) size D90. Data are presented as mean  $\pm$  SEM (n=9). P-values were determined by Student's *t*-test.

Figure S2

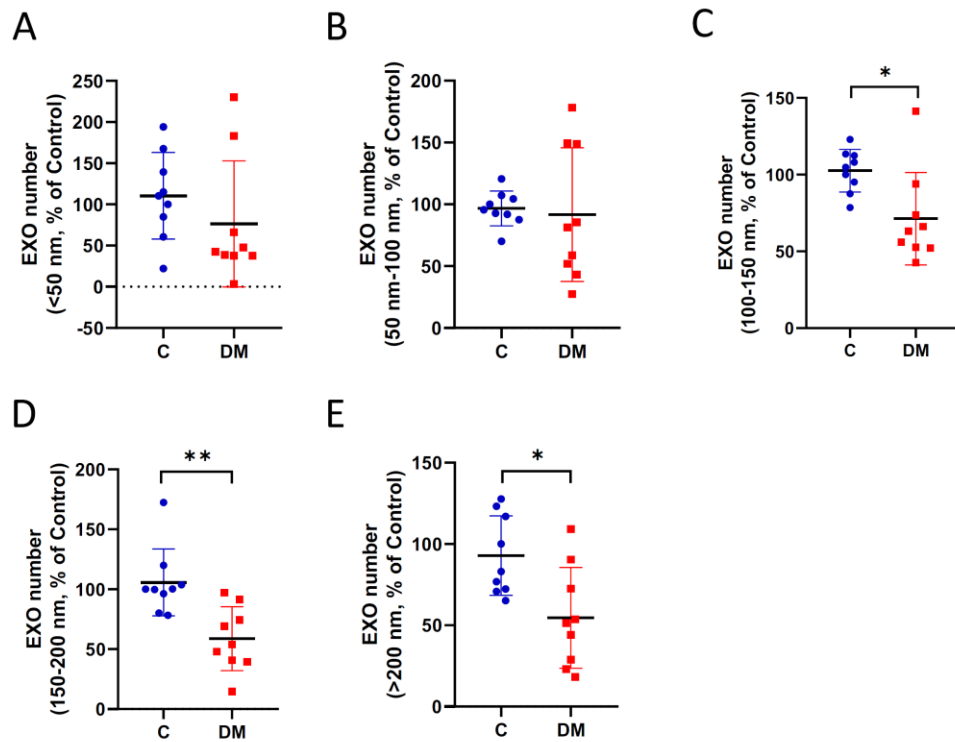

**Figure S2. EXO number in control and DM plasma.** The size-concentration distribution of EXOs was analyzed by nanoparticle tracking analysis (NTA). (A) EXO number of the size <50 nm, (B) 50 nm-100 nm, (C) 100-150 nm, (D) 150-200 nm and (E) >200 nm) Data are presented as mean  $\pm$  SEM (n=9). P-values were determined by Student's *t*-test.
